# Supplementary material for: Long-Term Impact of Direct-Acting Antivirals on Liver Fibrosis and Survival in HCV-Infected Liver Transplant Recipients
Source: Viruses. 2023 Aug 7;15(8):1702. doi: 10.3390/v15081702 (PMC10458217; doi:10.3390/v15081702)
Supplement: Supplementary file 1 [file viruses-15-01702-s001.zip › viruses-2485108-supplementary.pdf]

*Supplementary Table S1: Adverse events occurred during the treatment period in the overall study population (n=136).*

| <b>Adverse event</b>        | <b>Frequency<br/>N (%)</b> |
|-----------------------------|----------------------------|
| Anemia                      | 17 (13%)                   |
| Asthenia                    | 7 (5%)                     |
| Pruritus                    | 4 (3%)                     |
| Headache                    | 2 (1%)                     |
| Blood pressure elevation    | 2 (1%)                     |
| Jaundice                    | 1 (1%)                     |
| Dyspnea                     | 1 (1%)                     |
| Syncope                     | 1 (1%)                     |
| Tachycardia                 | 1 (1%)                     |
| <b>Total Adverse Events</b> | <b>36 (27%)</b>            |
